# Supplementary material for: The importance of livestock grazing at woodland-grassland interface in the conservation of rich oakwood plant communities in temperate Europe
Source: Springer Nature journal article supplement (doi:10.1007/s10531-021-02115-9), 2021-01-27
Supplement: MOESM1 [file 18805386]

## Sheet: DATA
Restoring rich oakwood plant communities requires the diaspore active transfer through woodland-grassland interface																										Biodiversity and Conservation
																	TCc									TCt									P1F													P1G
	Species		OLD	FOR	EDG	CLE	THI	SCR	XER	RUD	MEA	SEG	WET	L	R	N	TC1	TC2	TC3	TC4	TC5					TC6	TC7	TC8	TC9	TC10					P1-A1	P1-A2	P1-A3	P1-A4	P1-A5	P1-A6	P1-A7	P1-A8	P1-A9					P1-B1	P1-B2
Layer																	1	2	3	4	5					1	2	3	4	5					1	2	3	4	5	6	7	8	9					1	2
																						FR	S	D							FR	S	D											FR	S	D
Ch. Querco-Fabetea
a	Acer campestre	STOL		1			1							5	7	6	+	1	1	+		4	IV	220							0													0
b	Acer campestre	STOL		1			1							5	7	6				+		1	I	10							0													0
c	Acer campestre			1			1							5	7	6		+		+		2	II	20		+	+	+			3	III	30						1					1	I	55.5556
a	Acer platanoides	STOL		1										4			+					1	I	10							0													0
b	Acer platanoides	STOL		1										4			+					1	I	10							0													0
c	Acer platanoides			1										4			+			+		2	II	20					+		1	I	10						+			+		2	II	11.1111
a	Acer pseudoplatanus	STOL	0.5	1										4			+	3	1	2	1	5	V	1310		2				+	2	II	360						+		4	3		3	II	1116.67
b	Acer pseudoplatanus	STOL	0.5	1										4			+					1	I	10					+		1	I	10							+				1	I	5.55556
c	Acer pseudoplatanus		0.5	1										4		7	+				1	2	II	110		1	1	+	+	1	5	V	320		+	+	+	+	+		+	+		7	IV	38.8889
c	Actaea spicata		0.5	1										3	6	7			+			1	I	10					+		1	I	10											0
c	Adoxa moshatelina		1	1										5	7	8						0					+				1	I	10											0
c	Aegopodium podagraria						1		1	1				5	7	8	1	2	2	1	3	5	V	1650		+	+	+	1	+	5	V	140		+	+	+			1				4	III	72.2222
c	Allium ursinum			1										2	7	8						0									0													0
c	Anemone nemorosa		1	1	1		1										3	2	3	3	3	5	V	3350		2	1	3	2	3	5	V	2300		+	+				+	1	+	1	6	IV	133.333
c	Anemone ranunculoides			1			1							3	8	8		1	1	2	+	4	IV	560						+	1	I	10											0
c	Aposeris foetida			1			1							4	6	5	1	1	+	+	1	5	V	320		1	+	+	+	+	5	V	140			+	+		+	+	+	1	1	7	IV	138.889
c	Asarum europaeum			1			1							3	7	6	1	+	1	2	1	5	V	660		2	1	2	1	1	5	V	1000		+		+	+	+	1	+	+	1	8	V	144.444
c	Astrantia major			1			1							6	8	5	+	+		+	+	4	IV	40		1	+	+	+	+	5	V	140						+	+	+	2	+	5	III	216.667
c	Brachypodium sylvaticum			1	1		1							3	6	6	+	+			+	3	III	30		+	+				2	II	20			+	1	3	1	1		1	+	7	IV	650
c	Campanula persicifolia					1	1				1			5	8	3						0									0								+	+			+	3	II	16.6667
c	Campanula trachelium		0.5	1		1	1		1	1	1			4	8	8				+		1	I	10		+					1	I	10					+					+	2	II	11.1111
c	Carex digitata		0.5	1	1									3		4						0				+					1	I	10											0
c	Carex pilosa			1										4	5	5	3			+	1	3	III	860		3	3	3	3	2	5	V	3350										1	1	I	55.5556
c	Carex remota		1	1									1	3								0									0													0
c	Carex sylvatica		1	1										2	6	5		+		+		2	II	20		+	+	+	+	+	5	V	50								+		+	2	II	11.1111		+
a	Carpinus betulus	STOL		1										4			4	1	2	2	2	5	V	1230		3	2	2		1	4	IV	1550											0
b	Carpinus betulus	STOL		1										4			+		+		+	3	III	30					+		1	I	10							+				1	I	5.55556
c	Carpinus betulus			1										4							+	1	I	10		+			+	+	3	III	30										+	1	I	5.55556			+
a	Cerasus avium	BdLf	0.5	1										7		5						0				1	1	1			3	III	300									1		1	I	55.5556
b	Cerasus avium	BdLf	0.5	1										7		5						0				+				+	2	II	20											0
c	Cerasus avium		0.5	1										7		5						0				+	+				2	II	20		+		+			+				3	II	17
c	Circaea lutetiana		0.5	1			1							4	7	7	+	+	1	1	+	5	V	230		+		+	+	+	4	IV	40			+				2	+	1	+	5	III	266.667
c	Corydalis cava			1										3	8	8		2	1	1		3	III	550		1			1	+	3	III	210											0
c	Corydalis solida			1			1							3	7	7		+	+			2	II	20							0													0
a	Corylus avellana	COAV	0.5	1	1	1								6		5	1	2	1	1	+	5	V	660							0								1					1	I	55.5556
b	Corylus avellana	COAV	0.5	1	1	1								6		5						0									0				+			1		3	5	5		5	III	2422.22
c	Corylus avellana		0.5	1	1	1								6		5	+	+		+		3	III	30			+				1	I	10		+	1	1	1	+	2	+	+	+	9	V	388.889
c	Cruciata glabra						1		1	1				7	7	5						0									0								+					1	I	5.55556
c	Daphne mezereum			1			1							4	7	5	+	+	+	+		4	IV	40			+	+	+		3	III	30											0
c	Dentaria bulbifera			1										3	7	6	1	2	1	1	2	5	V	1000			1	2	2	2	4	IV	1150											0
c	Dentaria glandulosa			1													+	2	1	1		4	IV	560		1	+	1	3		4	IV	960											0
c	Dryopteris filix-mas		0.5	1			1							3	5	6	+	+		+	+	4	IV	40		+	+	1		1	4	IV	220								1		1	2	II	111.111
c	Epipactis atrorubens			1										6	8	2	1					1	I	100							0													0
c	Epipactis helleborine			1	1		1							3	7	5	+					1	I	10							0								+					1	I	5.55556
c	Equisetum telmateia			1									1	5	8	5						0									0													0
c	Eryngium campestre							1	1		1			9	8	3						0									0													0
c	Euphorbia amygdaloides		1	1										4	8	5	+			+	+	3	III	30		+	+	+	+		4	IV	40											0
a	Fagus sylvatica	STOL		1										3				2	3		2	3	III	1450		1	3	5	5	5	5	V	6100		2									1		194.444
b	Fagus sylvatica	STOL		1										3								0				1	1	1	1		4	IV	400											0
c	Fagus sylvatica			1										3							+	1	I	10			+	+		+	3	III	30											0
c	Festuca altissima			1			1							3	4	6		+			+	2	II	20							0													0
c	Festuca gigantea			1					1		1			4	6	6		+			+	2	II	20							0												1	1	I	55.5556
c	Ficaria verna			1	1		1						1	4	7	7	3	2	2	2	2	5	V	2150			+	2	1	+	4	IV	470											0
c	Fraxinus excelsior			1		1								4	7	7	1	+	+	+		4	IV	130		1	+		1		3	III	210							+			+	2	II	11.1111
a	Fraxinus exscelsior	BdLf		1		1								4	7	7	1	2				2	II	450		1					1	I	100											0
b	Fraxinus exscelsior	BdLf		1		1								4	7	7						0									0													0
c	Galeobdolon luteum		1	1			1		1	1	1			3	7	5	1	+	+	3	+	5	V	880		2	2	1	1	1	5	V	1000		+	+	+	+	+	2	+		+	8	V	233.333
c	Galium odoratum		1	1			1						1	2	6	5	1	1	+		1	4	IV	310		2	1	1	2	1	5	V	1000											0
c	Galium schultesii			1		1	1							5	7	4						0				+	1	+			3	III	120											0
c	Geranium phaeum			1			1			1	1			6	6	5		2	+	+		3	III	370							0													0
c	Hepatica nobilis		0.5	1			1							4	7	5				1	+	2	II	110		1	1	1			3	III	300											0
c	Impatiens noli-tangere			1			1						1	4	7	6				2	1	2	II	450		+		+	+	3	4	IV	780										+	1	I	5.55556
c	Isopyrum thalictroides			1			1							4	7	5				1		1	I	100		2	1		1		3	III	550											0
c	Lathyrus vernus		1	1	1		1	1			1			4	8	4				+	+	2	II	20		+	+	+	+	+	5	V	50											0
c	Lilium martagon		1	1		1	1		1		1			4	7	5				+		1	I	10		+	+				2	II	20									+	+	2	II	11.1111
b	Lonicera xylosteum	Other		1			1	1	1	1				5	7	6						0									0													0
c	Lonicera xylosteum			1			1	1	1	1				5	7	6	+					1	I	10							0						+			+			+	3	II	16.6667
c	Luzula luzuloides		0.5	1			1							4	3	4						0									0													0
c	Lysimachia nemorum		1	1	1									2	7	7					+	1	I	10							0													0
c	Melica nutans		1	1										4		3						0						+			1	I	10					+						1	I	5.55556
c	Melittis melissophyllum			1			1							5	6	3						0					+				1	I	10											0
c	Mercurialis perennis		1	1			1							2	8	7	+	3		2	+	4	IV	1120		+					1	I	10											0
c	Milium effusum		1	1										4	5	5		+	+	+	+	4	IV	40		+	+	+	+	+	5	V	50											0
c	Neottia nidus-avis		1	1										2	7	5	+					1	I	10							0													0
c	Paris quadrifolia		1	1			1							3	7	7	+		+	+	+	4	IV	40		+	+	+		+	4	IV	40		+		+			+	+			4	III	22.2222
c	Phyteuma spicatum		1	1	1		1								6	5	+					1	I	10			+	+			2	II	20			+								1	I	5.55556
c	Poa nemoralis		1	1			1							5	5	4		+		+		2	II	20			+				1	I	10							+			+	2	II	11.1111
c	Polygonatum multiflorum		1	1			1							2	6	5	+		+	+		3	III	30		+	+	+	+	+	5	V	50								+			1	I	5.55556
c	Primula veris			1				1		1	1			7	8	3						0									0								+					1	I	5.55556
c	Pulmonaria mollis			1			1							5	8	5						0									0													0
c	Pulmonaria obscura			1			1							4	8	7		1	1	2		3	III	550		1		+	+	+	4	IV	130		+	+				+	+	+		5	III	27.7778
c	Ranunculus auricomus												1	5	7							0									0													0
c	Ranunculus cassubicus			1										6	6		+		+	+		3	III	30		+	+	+			3	III	30				+			1		1	+	4	III	122.222
c	Ranunculus lanuginosus			1										3	7	7		+	+	+	+	4	IV	40							0													0
c	Ranunculus polyanthemos			1			1							6		2						0									0													0
c	Rumex sanguineus			1										4	7	7						0									0													0
c	Salvia glutinosa			1			1							4	7	7	+	1	+	1	+	5	V	230		1	1	+	+	+	5	V	230								1	+	+	3	II	66.6667
c	Sanicula europaea		1	1			1							6	8	6	+				+	2	II	20		+	+		+	+	4	IV	40		+	+	+			+	+	+	+	7	IV	38.8889
c	Scilla bifolia			1			1							5	7	6	+	2	1	2	1	5	V	910		2	2	1	1		4	IV	900											0
c	Scrophularia nodosa		0.5	1		1	1		1	1			1	4	6	7						0				+			+	+	3	III	30											0
c	Stachys sylvatica			1			1							4	7	7	+	2	+	+	1	5	V	480		+	+		+	+	4	IV	40		+						+		+	3	II	16.6667
c	Stellaria holostea		0.5	1			1							5	6	5	1	1	1	1	2	5	V	750		+	+		+	2	4	IV	380											0
c	Stellaria nemorum			1									1	4	5	7		+	+	+	+	4	IV	40							0													0
a	Tilia cordata	STOL	0.5	1			1							5		5		1		2	+	3	III	460		1	3				2	II	850											0
b	Tilia cordata	STOL	0.5	1			1							5		5						0				1	1	1			3	III	300											0
c	Tilia cordata		0.5	1			1							5		5				+		1	I	10		+		+			2	II	20											0
a	Ulmus glabra			1														+				1	I	10							0													0
b	Ulmus glabra			1																1		1	I	100							0													0
c	Ulmus glabra			1										4	7	7			+	+		2	II	20			+	+			2	II	20											0
c	Veronica montana		0.5	1										4	5	6	1					1	I	100							0													0
c	Viola reichenbachiana		1	1										4	7	6					+	1	I	10		+				+	2	II	20		+	+								2	II	11.1111
Ch. Quercetea robori-petraea
c	Hieracium murorum			1		1	1							4	5	4						0									0													0
c	Quercus petraea		0.5	1										6								0									0													0
Ch. Alnetea glutinosae
c	Lycopus europaeus			1									1	7	7	7		+				1	I	10							0													0
b	Salix cinerea	Pion				1							1	7	5	4						0									0													0
c	Salix cinerea					1							1	7	5	4						0									0													0					+
Ch. Vaccinio-Piceetea
a	Abies alba	STOL		1										3			2	+				2	II	360							0									1				1	I	55.5556
b	Abies alba	STOL		1										3								0									0													0
c	Abies alba			1										3			+					1	I	10							0						+	+						2	II	11.1111
c	Melampyrum pratense		1	1									1	6	3	2						0									0							+						1	I	5.55556
a	Picea abies	Other		1										5								0									0													0
b	Picea abies	Other		1										5								0									0													0
c	Picea abies			1										5								0									0													0
a	Pinus sylvestris			1													+					1	I	10							0													0
c	Vaccinium myrtillus		1	1			1							5	2	3						0									0													0
Ch. Betulo-Adenostyletea
c	Calamagrostis arundinacea			1		1	1							6	4	5						0									0													0
c	Carduus personata						1						1	7	8	8						0									0									+				1	I	5.55556
c	Doronicum austriacum			1			1						1	5	7	7						0									0													0
c	Hieracium aurantiacum													8	4	2						0									0													0
c	Orobanche flava				1								1	9	9	2						0									0								+					1	I	5.55556
c	Petasites albus			1			1							4		5		1			+	2	II	110		+					1	I	10											0
c	Petasites kablikianus												1	5		4						0									0													0
c	Poa chaixi				1		1		1					6	3	4						0									0													0
c	Polygonatum verticillatum			1										4	4	5						0									0													0
c	Primula elatior		0.5	1				1		1	1			6	7	7	+	+	+	2	+	5	V	390		1		1			2	II	200			+	+		+	+	+	1	+	7	IV	88.8889
c	Senecio nemorensis			1		1							1	7		8						0									0													0
c	Veratrum lobelianum			1									1	7	7	6	+					1	I	10							0													0
Ch. Rhamno-Prunetea
b	Cornus sanguinea	Other		1			1							7	7							0									0													0
c	Cornus sanguinea			1			1							7	7			+				1	I	10							0						+			+		+	+	4	III	22.2222
a	Crataegus monogyna	Other		1		1		1						7	8	4						0									0								1					1	I	55.5556
b	Crataegus monogyna	Other		1		1		1						7	8	4			+			1	I	10							0											+		1	I	5.55556
c	Crataegus monogyna			1		1		1						7	8	4	+					1	I	10		+	+	+			3	III	30		+	+	+		+	1	+	+	+	8	V	94.4444
c	Euonymus europaeus			1			1							6	8	5	+		+	+		3	III	30		+	+				2	II	20											0
b	Euonymus verrucosa	Other		1				1						5	7	3						0									0													0
c	Euonymus verrucosa			1				1						5	7	3						0									0													0
b	Prunus spinosa	Pion			1						1			7	7							0									0								+					1	I	5.55556
c	Prunus spinosa				1						1			7	7							0									0							+	+					2	II	11.1111		+
b	Rosa canina	Other						1	1					8								0									0								+					1	I	5.55556
c	Rosa canina							1	1					8								0									0					+		+	+	+			+	5	III	27.7778			+
c	Rubus plicatus				1		1		1					8		6						0									0													0
b	Viburnum opulus	Other		1					1	1			1	6	7	6						0									0													0
c	Viburnum opulus			1					1	1			1	6	7	6	+					1	I	10							0					+	+							2	II	11.1111
Ch. Nardo-Callunetea
c	Agrostis capillaris					1	1			1	1			7	4	4						0									0					I	1	3	2	1			1	6	IV	777.778		1
c	Arnica montana				1					1				9	3	2						0									0													0
c	Calluna vulgaris													8	1	1						0									0													0
c	Carex pilulifera			1	1		1	1						5	3	3						0									0													0
c	Danthonia decumbens			1									1	8	3	2						0									0													0
c	Genista tinctoria							1			1			8	6	1						0									0													0
c	Hieracium lachenalli										1			5	4	2						0									0													0
c	Hieracium pilosella										1			7		2						0									0													0
c	Luzula campestris									1		1		7	3	3						0									0													0
c	Nardus stricta													8	2	2						0									0													0
c	Polygala vulgaris			1										7	3	2						0									0													0
c	Potentilla erecta			1				1		1			1	6		2						0									0							+	+	+				3	II	16.6667
c	Veronica officinalis			1						1				6	3	4						0									0					+			+				+	3	II	16.6667
c	Viola canina						1			1				7	3	2						0									0												+	1	I	5.55556
Ch. Molinio-Arrhenatheretea
c	Achillea millefolium				1				1	1				8		5						0									0					+	+	+	+				+	5	III	27.7778		+
c	Agrostis gigantea			1			1			1				7	7	6						0									0													0
c	Agrostis stolonifera												1	8		5						0									0													0
c	Alchemila monticola				1					1				6	6	4						0									0													0
c	Alopecurus pratensis					1			1	1				6	6	7						0									0													0
c	Angelica sylvestris						1						1	7		4						0									0								2				+	2	II	200
c	Arrhenatherum elatius								1	1				8	7	7						0									0						+	1	+					3	II	66.6667		1	1
c	Bellis perennis								1	1				8		6						0									0													0
c	Betonica officinalis													7		3						0									0													0
c	Bromus hordeaceus									1	1	1		7		3						0									0													0
c	Campanula patula			1		1				1				8	7	5						0									0					+		+	+	+				4	III	22.2222			+
c	Carex hirta			1						1				7		5						0									0													0
c	Carum carvi							1		1				8		6						0									0													0				+
c	Centaurea jacea						1			1	1			7								0									0							+	+					2	II	11.1111		+	1
c	Cerastium holosteoides				1				1	1				6		5						0									0													0				+
c	Cirsium oleraceum						1				1		1	6	7	5		+				1	I	10							0													0
c	Cirsium palustre						1						1	7	4	3						0									0													0
c	Cirsium rivulare												1	9	8	5						0									0								+					1	I	5.55556
c	Colchicum autumnale								1			1		6	7							0									0													0
c	Crepis biennis			1		1		1						7	6	5						0									0						+		+					2	II	11.1111
c	Cynosurus cristatus									1				8		4						0									0								+					1	I	5.55556		1	1
c	Dactylis glomerata							1		1				7		6						0									0							+	1					2	II	61.1111		1	1
c	Dactylorhiza majalis												1	8	7	3						0									0													0
c	Daucus carota								1	1	1			8		4						0									0								+				+	2	II	11.1111		1	1
c	Deschampsia caespitosa			1			1			1	1		1	6		3		+				1	I	10							0							+						1	I	5.55556		+	+
c	Epilobium palustre												1	7	3	2						0									0													0
c	Euphrasia rostkoviana			1										6		4						0									0													0					+
c	Festuca arundinacea			1			1							8	7	6						0									0									1				1	I	55.5556		2	1
c	Festuca pratensis			1		1				1	1			8		6						0									0							2	+	1				3	II	255.556
c	Festuca rubra			1			1		1	1	1				6							0									0												+	1	I	6			+
c	Filipendula ulmaria			1				1			1			7		5						0									0													0
c	Galium boreale			1			1							6	8	2						0									0													0					+
c	Galium mollugo			1			1							7	7							0									0													0
c	Geranium pratense						1			1			1	8	8	7						0									0							1						1	I	55.5556		+
c	Heracleum sphondylium						1			1				7		8						0									0							+	+					2	II	11.1111		+
c	Holcus lanatus					1				1				7		5						0									0					+	+	+	1	+				5	III	77.7778		4	3
c	Hypericum tetrapterum												1	7	7	5						0									0													0
c	Juncus conglomeratus												1	8	4	3						0									0													0
c	Juncus effusus									1				8	3	4						0									0													0
c	Knautia arvensis						1		1	1	1			7		4						0									0							+	+					2	II	11.1111
c	Lathyrus pratensis						1			1				7	7	6						0									0													0					+
c	Leontodon autumnalis						1		1	1				7	5	5						0									0												+	1	I	5.55556
c	Leontodon hispidus								1	1				8	7	6						0									0									+				1	I	5.55556		1	+
c	Leucanthemum vulgare				1		1	1			1			7		3						0									0					+	+	1	3					4	III	483.333		+	+
c	Lolium perenne			1									1	8	7	7						0									0							+					+	2	II	11.1111		1
c	Lotus corniculatus			1			1							7	7	3						0									0							+	+				+	3	II	16.6667		1	2
c	Lotus uliginosus									1	1			7	6	4						0									0													0
c	Lysimachia nummularia									1			1	4								0									0													0
c	Lysimachia vulgaris										1		1	6						+		1	I	10							0							+	+					2	II	11.1111
c	Lythrum salicaria												1	7	6							0									0													0
c	Mentha longifolia												1	7	9	7						0									0							+						1	I	5.55556
c	Molinia caerulea												1	7		2						0									0													0
c	Myosotis palustris										1		1	7		5		+				1	I	10							0													0
c	Ophioglossum vulgatum												1	7	7	2						0									0													0
c	Pastinaca sativa							1	1	1				8	8	5						0									0													0
c	Phleum pratense									1				7		7						0									0						+	1	+					3	II	66.6667		+
c	Plantago lanceolata							1	1	1				6								0									0							+	+					2	II	11.1111		1	+
c	Plantago major								1	1				8		6						0									0						+		+	+			+	4	III	22.2222
c	Poa pratensis					1	1			1				6		6						0									0													0				1
c	Poa trivialis					1			1			1	1	6		7						0									0							1						1	I	55.5556
c	Polygonum bistorta												1	7	5	5						0									0													0
c	Potentilla anserina								1	1				7		7						0									0													0
c	Potentilla reptans					1	1		1	1				6	7	5						0									0													0				+
c	Prunella vulgaris						1		1	1				7	7							0									0						+	+	+	+			+	5	III	27.7778		+	1
c	Ranunculus acris						1			1				7								0									0							+	2	+			+	4	III	211.111		+	+
c	Ranunculus repens						1		1	1				6		7						0									0				+	+		+						3	II	16.6667
c	Rhinanthus minor			1			1							7		3						0									0													0					+
c	Rorippa sylvestris										1			6	8	6						0									0									2			2	2	II	388.889
c	Rumex acetosa					1			1	1				8		6						0									0								+					1	I	5.55556
c	Rumex crispus								1	1		1		7		6						0									0												+	1	I	5.55556			+
c	Sanguisorba officinalis												1	7		5						0									0							+	+					2	II	11.1111			+
c	Scirpus sylvaticus									1			1	6	4	4						0									0													0
c	Silene flos-cuculi												1	7								0									0					+								1	I	5.55556		+	+
c	Stachys palustris											1	1	7	7	6						0									0													0
c	Taraxacum officinale				1	1			1	1		1		7		8						0									0					+	+	+		+			+	5	III	27.7778
c	Tragopogon pratensis								1	1				7	7	6						0									0								+				+	2	II	11.1111
c	Trifolium dubium											1	1	6	6	4						0									0						+							1	I	5.55556			2
c	Trifolium hybridum								1				1	7	7	5						0									0													0
c	Trifolium montanum							1			1			8	8	2						0									0								+				+	2	II	11.1111
c	Trifolium pratense						1		1	1				7								0									0												+	1	I	5.55556		+	+
c	Trifolium repens								1	1				8	6	6						0									0						+	+	+	+			+	5	III	27.7778		2	+
c	Trisetum flavescens				1					1				7		5						0									0													0					+
c	Vicia cracca						1			1		1		7								0									0							+						1	I	5.55556		+	+
Ch. Festuco-Brometea
c	Achillea collina									1				9	7	2						0									0													0
c	Allium oleraceum			1		1	1		1		1			7	7	4			+	+		2	II	20							0													0
c	Brachypodium pinnatum					1	1				1			6	7	4						0									0							+	2					2	II	200
c	Campanula glomerata						1				1			7	7	3						0									0							+	+				+	3	II	16.6667
c	Carex caryophyllea			1							1			8		2						0									0													0
c	Carlina vulgaris						1			1	1			7	7	3						0									0													0
c	Centaurea scabiosa						1		1	1	1			7	8	4						0									0							+	+					2	II	11.1111
c	Euphorbia cyparissias									1	1			8		3						0									0							+						1	I	5.55556
c	Filipendula vulgaris			1			1							7	8	2						0									0													0					+
c	Plantago media							1			1			7	7	3						0									0													0				+	+
c	Salvia pratensis							1		1	1			8	8	4						0									0								1					1	I	55.5556
c	Salvia verticillata							1	1		1			9	7	5						0									0													0
c	Veronica austriaca				1						1			8	9	2						0									0													0
Ch. Trifolio-Geranietea sanguinei
c	Agrimonia eupatoria						1		1		1			7	8	4						0									0													0				+
c	Astragalus glycyphyllos			1			1				1			6	7	3						0									0													0
c	Campanula rapunculoides						1			1	1			6	7	4						0					+				1	I	10											0
c	Coronilla varia			1							1			7	9	3						0									0							+						1	I	5.55556
c	Fragaria viridis			1			1		1			1		7	8	3						0									0													0
c	Galium verum							1			1			7	7	3						0									0							1	+					2	II	61.1111
c	Geranium sanguineum				1			1			1			7	8	3						0									0													0
c	Medicago falcata							1	1		1			8	9	3						0									0													0
c	Melampyrum nemorosum			1				1						5	6	4						0									0					1	+	+	3				+	5	III	488.889
c	Origanum vulgare				1			1			1			7	8	3						0									0													0
c	Polygonatum odoratum			1			1							7	7	3						0									0													0
c	Trifolium medium			1				1			1			7	6	3						0									0													0
c	Vicia dumetorum			1	1	1								6	8	4				+		1	I	10							0													0
c	Vicia sepium		0.5	1			1		1	1					6	5						0									0													0
c	Vicia sylvatica			1			1							7	8							0									0										+			1	I	5.55556
Ch. Artemisietea vulgaris
c	Alliaria petiolata			1			1							5	7	9						0									0				+					1				2	II	61.1111
c	Anthriscus sylvestris			1						1	1		1	7		8				2		1	I	350		+	+				2	II	20											0
c	Arctium tomentosum				1		1		1					8	8	9						0									0										+			1	I	5.55556
c	Armoracia rusticana								1			1		8		9						0									0													0
c	Calystegia sepium						1						1	8	7	9						0									0													0
c	Chaerophyllum aromaticum			1	1									7	6	8						0							+		1	I	10											0
c	Chaerophyllum temulum			1	1									5		8	+	+				2	II	20				+			1	I	10											0
c	Cichorium intybus								1	1				9	8	5						0									0													0
c	Cirsium arvense						1		1	1		1		8		7						0									0									+			1	2	II	61.1111
c	Cirsium vulgare				1		1		1					8	7	8						0									0													0
c	Cruciata laevipes				1			1		1				7	6	7						0									0													0
c	Cuscuta europaea						1			1		1				7						0									0													0
c	Dipsacus sylvestris						1		1				1	9	8	7						0									0													0
c	Epilobium hirsutum												1	7	8	8						0									0									+				1	I	5.55556
c	Epilobium montanum			1		1	1						1	4	6	6					+	1	I	10		+					1	I	10			+		+					+	3	II	16.6667
c	Eupatorium cannabinum												1	7	7	8		+				1	I	10		+					1	I	10					+						1	I	5.55556
c	Galium aparine				1			1		1				7	6	8						0									0													0
c	Galium rivale			1			1							7	8	5						0									0									+				1	I	6
c	Geranium robertianum			1			1		1	1				5		7				+		1	I	10							0						+			+		+	+	4	III	22.2222
c	Geum urbanum			1			1		1	1				4		7		+		+	+	3	III	30							0												+	1	I	5.55556
c	Glechoma hederacea			1			1		1	1	1			6		7		+		+		2	II	20			+				1	I	10					+					+	2	II	11.1111
c	Impatiens parviflora								1					4		6						0									0													0
c	Lamium maculatum						1		1					5	7	8						0									0													0
c	Melilotus albus							1	1		1			9	7	4						0									0													0
c	Melilotus officinalis						1		1	1				8	8	3						0									0						+							1	I	5.55556
c	Rubus caesius			1		1	1		1					6	8	7						0									0													0
c	Scrophularia umbrosa												1	7	8	7						0									0													0
c	Solidago gigantea			1			1				1			8		7						0									0												+	1	I	5.55556
c	Tanacetum vulgare				1		1		1		1		1	8	8	5						0									0													0
c	Torillis japonica						1		1					6	8	8						0									0											+		1	I	5.55556
c	Tussilago farfara				1	1				1			1	8	8							0									0									+			+	2	II	11.1111
c	Urtica dioica								1	1					7	9		2	1	+		3	III	460							0									+	+		+	3	II	16.6667
c	Viola odorata			1			1		1					5		8						0									0						+	+						2	II	11.1111
Ch. Agropyterea intermedio-repentis
c	Agropyron repens				1		1		1		1			7		7						0									0													0
c	Bromus inermis							1			1			8	8	5						0									0													0
c	Convolvulus arvensis			1			1							7	7							0									0													0
c	Elymus repens				1		1			1		1		7		7						0									0							2						1	I	194.444		+
c	Equisetum arvense									1		1		6		3						0									0													0					+
Ch. Stellarietea mediae
c	Anagalis arvensis											1		6		6						0									0								+					1	I	5.55556
c	Chenopodium album								1			1				7						0									0													0
c	Erigeron canadensis								1			1		8		7						0									0													0
c	Galeopsis tetrahit			1	1		1		1			1		7		6	+					1	I	10							0								+	1			+	3	II	66.6667
c	Lamium purpureum								1			1		7	7	7						0									0				+									1	I	5.55556
c	Lapsana communis			1			1		1			1		5		7						0									0												1	1	I	55.5556
c	Lathyrus tuberosos										1	1		7	8	4						0									0													0
c	Matricaria maritima								1			1		7	6	6						0									0													0
c	Myosotis arvensis			1			1		1			1		6		6						0									0													0
c	Oxalis stricta								1			1		7	6	5						0									0													0
c	Polygonum aviculare								1			1		7		6						0									0													0
c	Stellaria media						1		1			1		6	7	8						0									0													0
c	Vicia angustifolia									1		1		5								0									0													0
c	Vicia tetrasperma						1		1	1		1		6	5	5						0									0													0
c	Vicia vilosa								1			1		7	6	5						0									0													0
Ch. Koelerio-Corynephoretea
c	Festuca ovina									1				7	3	1						0									0													0
c	Hieracium umbellatum			1						1				6	4	2						0									0													0
c	Hypochaeris radicata						1		1	1				8	4	3						0									0													0
c	Rumex acetosella					1		1	1					8	2	2						0									0													0
c	Viola tricolor								1			1		7								0									0													0
Ch. Epilobietea angustifolii
c	Arctium nemorosum				1		1			1				6	7	9						0				+					1	I	10											0
c	Calamagrostis epigejos					1	1				1		1	7		6						0									0								+	+			1	3	II	66.6667
c	Centaurium erythraea						1			1	1			8	6	6						0									0					+	+	1	1	+				5	III	127.778
c	Chamaenerion angustifolium					1			1							7						0									0													0
c	Fragaria vesca							1			1			7		6						0									0					+		+	+					3	II	16.6667
c	Hypericum hirsutum			1	1	1	1							7	8	7						0				+					1	I	10											0
b	Rubus idaeus	Other		1		1	1							7		6						0									0													0
c	Rubus idaeus			1		1	1							7		6	+					1	I	10		+					1	I	10										+	1	I	5.55556
a	Salix caprea	Pion		1		1								7	7	7						0									0										2	2		2	II	388.889
b	Salix caprea	Pion		1		1								7	7	7						0									0								1					1	I	55.5556
c	Salix caprea			1		1								7	7	7						0									0								+					1	I	5.55556
b	Sambucus nigra	Other		1			1		1					7		9						0									0													0
c	Sambucus nigra			1			1		1					7		9						0									0				+					+	+		+	4	III	22.2222
c	Senecio fuchsii			1		1							1	7		8	+			+	+	3	III	30			+	+	+	+	4	IV	40										+	1	I	5.55556
c	Verbascum nigrum		0.5					1	1		1			7	7	7						0									0													0
Ch. Isoëto-Nanojuncetea
c	Juncus bufonius											1	1	7	3	4						0									0													0
c	Radiola linoides										1			8	3	2						0									0													0
Ch. Phragmitetea
c	Carex gracilis												1	7	6	4						0									0													0
c	Carex vulpina									1			1	9		5						0									0													0
c	Glyceria fluitans												1	7		7						0									0													0
Ch. Scheuchzerio-Caricetea nigrae
c	Carex echinata			1						1			1	8	3	2						0									0													0
c	Carex nigra												1	8	3	2						0									0													0
Other
c	Ajuga reptans		0.5	1	1		1							6	6	6	+			+		2	II	20			+	+	+		3	III	30			+	+	+	+	+			1	6	IV	83.3333
a	Alnus glutinosa	Pion											1	5	6							0									0													0
b	Alnus glutinosa	Pion											1	5	6							0									0													0
c	Alnus glutinosa												1	5	6							0									0													0
c	Anthoxanthum odoratum			1						1			1		5				+			1	I	10							0								1					1	I	55.5556		+	+
c	Anthriscus nitida			1									1	4	8	8						0									0													0
c	Arum alpinum		0.5	1			1							3	7	8		+	+			2	II	20							0													0
c	Athyrium filix-femina			1			1							3		6	+	+	+		1	4	IV	130		+	+	+	1	1	5	V	230		+								+	2	II	11.1111
a	Betula pendula	Pion		1			1							7								0								+	1	I	10			3	2	1						3	II	666.667
b	Betula pendula	Pion		1			1							7								0									0													0
c	Betula pendula			1			1							7								0									0					+		+						2	II	11.1111
c	Briza media					1				1				8		2						0									0													0
c	Capsella bursa-pastoris				1				1		1			7		6						0									0													0
c	Cardamine hirsuta												1	6	5	7						0									0													0
c	Carex brizoides			1	1			1		1				6	4	3						0									0													0
c	Carex ovalis					1				1	1			7	3	3						0									0													0
c	Carex pairae					1					1			8	4	4						0									0													0
c	Carex pallescens			1		1	1							7	4	3						0									0							+						1	I	5.55556
c	Carex panicea												1	4	5	5						0									0													0
c	Carex transylvanica										1			9		5						0									0													0
c	Chaerophyllum hirsutum				1		1						1	6		7				+		1	I	10							0											+		1	I	5.55556
c	Convallaria majalis		1	1	1	1								5		4						0									0													0
c	Dactylorhiza incarnata												1	8	7	2						0									0													0
c	Dactylorhiza maculata			1									1	7		2						0									0													0
c	Dianthus armeria									1				6		3						0									0								+					1	I	5.55556
c	Dianthus sp.										1											0									0													0
c	Dryopteris carthusiana			1			1							5	4	3						0									0													0
c	Equisetum sylvaticum			1		1	1							3	5	4						0									0													0
c	Erigeron annuus					1			1				1	7		8						0									0					+	+	1	1	1			3	6	IV	594.444
a	Frangula alnus	Other		1							1		1	6	4							0									0													0
b	Frangula alnus	Other		1							1		1	6	4							0									0													0
c	Frangula alnus			1							1		1	6	4							0									0													0
c	Gentiana asclepiadea			1			1			1				7	7	2						0									0													0
c	Gnaphalium uliginosum											1	1	7	4	4						0									0													0
c	Gymnocarpium dryopteris			1										3	4	5						0									0													0
c	Hedera helix		0.5	1	1				1	1				4						1		1	I	100		+		+	+	1	4	IV	130			+	+							2	II	11.1111
c	Hypericum perforatum			1			1	1		1	1			7	6	4	+					1	I	10							0					+	+	+	1	+			1	6	IV	133.333
c	Hypochaeris maculata			1			1			1				7	6	2						0									0													0
c	Hypohaeris glabra								1		1			9	3	1						0									0													0
a	Larix decidua																					0				1				+	2	II	110											0
c	Lathraea squamaria			1			1							3	7	6						0					+				1	I	10											0
c	Listera ovata			1						1			1	6	7	7						0						+			1	I	10											0
c	Luzula pilosa		1	1			1							2	5	4						0									0								+	+			+	3	II	16.6667
c	Maianthemum bifolium		1	1			1							3	3	3	+				+	2	II	20		+	1	+	+	+	5	V	140							+				1	I	5.55556
a	Malus domestica	Other		1	1									7	7	5						0									0													0
b	Malus domestica	Other		1	1									7	7	5						0									0													0
c	Malus domestica			1	1									7	7	5						0									0													0
c	Medicago lupulina						1		1	1				7	8							0									0												+	1	I	5.55556		+
c	Melandrium rubrum			1	1										7	8						0									0													0
c	Mentha arvensis											1	1	7								0									0													0
c	Moehringia trinerva			1										4	6	7						0									0									1			+	2	II	61.1111
c	Mycelis muralis			1		1	1							4		6						0					+	+			2	II	20										+	1	I	5.55556
c	Nepeta pannonica							1			1			8	7							0									0													0
c	Odontites serotinus				1			1		1				6	7	5						0									0													0
c	Ononis arvensis										1			8	7	2						0									0							+						1	I	5.55556
c	Oxalis acetosella		1	1			1							1	4	6	1			+	+	3	III	120		+		+	+		3	III	30							+		+	+	3	II	16.6667
c	Pimpinella saxifraga								1		1			7		2						0									0							+	+					2	II	11.1111			2
c	Platanthera bifolia													6	7							0									0								+					1	I	5.55556			+
c	Poa annua					1			1	1				7		8						0									0													0
c	Polygala comosa							1			1			8	8	2						0									0													0
c	Polygonum hydropiper						1		1				1	7	5	8						0									0													0
c	Polygonum persicaria								1			1		6	7	7						0									0													0
a	Populus tremula	Pion	0.5	1		1	1							6								0									0					1		1	+					3	II	116.667
b	Populus tremula	Pion	0.5	1		1	1							6								0									0													0
c	Populus tremula		0.5	1		1	1							6								0									0					+	+	+	+				+	5	III	27.7778
c	Pteridium aquilinum		1	1										6	3	3						0									0													0
b	Pyrus communis	Pion		1				1			1			6	8							0									0													0
c	Pyrus pyraster			1				1			1			6	8							0									0													0
a	Quercus robur	QUsp		1										7			3	2	3	2	3	5	V	2950		2	1	1	1	1	5	V	750			2	3		2	2	1		3	6	IV	1472.22
b	Quercus robur	QUsp		1										7			+					1	I	10							0													0
c	Quercus robur			1										7							+	1	I	10			1	1			2	II	200			+		+	+	+			1	5	III	77.7778
b	Quercus rubra	Other		1																		0									0													0
c	Quercus rubra			1																		0									0													0
c	Rosa rugosa								1					7		6						0									0													0
b	Rubus hirtus	Other		1	1	1								7		6						0									0													0
c	Rubus hirtus			1	1	1								7		6						0				+	+	+	+	+	5	V	50		+		+			2	+	1	+	6	IV	272.222
c	Senecio jacobea						1		1	1				8	7	5						0									0													0
c	Solidago virgaurea			1			1							5		4						0									0													0
a	Sorbus aucuparia	Pion		1				1			1			6	4							0									0													0
b	Sorbus aucuparia	Pion		1				1			1			6	4							0									0													0
c	Sorbus aucuparia			1				1			1			6	4							0									0													0
c	Staphylea pinnata			1			1							7	8	4						0					+				1	I	10											0
c	Stellaria graminea							1		1				6	4	3						0									0													0					+
c	Symphytum officinale											1	1	7		8						0									0													0
c	Symphytum tuberosum			1										4	7	5				+		1	I	10				+			1	I	10											0
c	Thymus pulegioides			1					1	1	1			8		1						0									0													0
c	Trifolium aureum						1		1		1			7	4	2						0									0													0
c	Trifolium pannonicum							1			1			8	7	3						0									0													0
c	Veronica chamaedrys			1				1		1				6								0									0								+				+	2	II	11.1111
c	Viola riviniana			1				1						5	4							0									0													0
[truncated: 158 more columns]

## Sheet: Authors
Authors
1. Paweł Wolańskia, e-mail: wolanski@ur.edu.pl,
2. *Andrzej Bobiecb - Corresponding author, e-mail: a_bobiec@ur.edu.pl
3. Bernadetta Ortylb, e-mail: zawadzka@ur.edu.pl
4. Iwona Makuch-Pietraśb, e-mail: makuchiw@ur.edu.pl
5. Paweł Czarnotac, e-mail: pawczarnota@poczta.onet.pl
6. Jan Ziobro, e-mail: j.s.ziobro@gmail.com
7. Mykola Korold, e-mail: nikkorol@ukr.net
8. Serhii Havryliukd, e-mail: serhiy_havrylyuk@nltu.edu.ua
9. Jakub Paderewskie, e-mail: jakub_paderewski@sggw.pl
10. Keith Kirbyf, e-mail: keith.kirby@bnc.oxon.org
University of Rzeszów, Institute of Agricultural Sciences, Land Management and Environmental Protection, aDepartment of Agroecology, bDepartment of Nature Conservation and Landscape Ecology, cDepartment of Ecology and Environmental Protection, 35-601, Rzeszów, Poland
d Ukrainian National Forestry University, Forestry and Park Gardening, 79057, Lviv, Ukraine
e Warsaw University of Life Science, Department of Experimental Design and Bioinformatics, 02-787 Warsaw, Poland
f University of Oxford, Department of Plant Sciences, OX2 6TL, UK
